# Supplementary material
Source: PubMed Central journal article supplement (PMC3262859)
Supplement: supp_kfr315_KFR315_toxsci-11-0835-File010.pdf [file supp_kfr315_KFR315_toxsci-11-0835-File010.pdf]

## SUPPLEMENTAL TABLE 1.

|                        | <i>Cyp11b1</i>      | <i>Scarb1</i>  | <i>Star</i>    | <i>Cyp17a1</i> | <i>Cyp11a1</i> | <i>Hsd3b</i>   | <i>Insl3</i>   | <i>Cyp11b2</i> | T production   |
|------------------------|---------------------|----------------|----------------|----------------|----------------|----------------|----------------|----------------|----------------|
| <b><u>DPeP</u></b>     |                     |                |                |                |                |                |                |                |                |
| Hill Slope             | -1.195              | -0.9602        | -1.029         | -1.082         | -0.9952        | -0.6796        | -0.9144        | -0.6416        | -1.405         |
| ED50                   | 25.71               | 34.84          | 43.3           | 58.25          | 60.91          | 62.89          | 73.9           | 159.1          | 45.96          |
| 95% C.I.               | 14.73 to 44.87      | 28.33 to 42.86 | 28.72 to 65.28 | 49.56 to 68.47 | 51.81 to 71.60 | 47.48 to 83.32 | 50.73 to 107.6 | 57.67 to 439.1 | 29.61 to 71.34 |
| <b><u>DihexylP</u></b> |                     |                |                |                |                |                |                |                |                |
| Hill Slope             | -1.736              | -0.7926        | -0.6883        | -1.124         | -1.445         | -0.5399        | -1.109         | -2.502         | -1.007         |
| ED50                   | 88.56               | 85.55          | 54.08          | 118.8          | 266.7          | 185.1          | 141.6          | 371.7          | 75.25          |
| 95% C.I.               | 58.70 to 133.6      | 51.03 to 143.4 | 25.13 to 116.4 | 82.88 to 170.3 | 197.4 to 360.2 | 138.3 to 247.7 | 116.6 to 172.0 | 195.6 to 706.2 | 39.76 to 142.4 |
| <b><u>DHP</u></b>      |                     |                |                |                |                |                |                |                |                |
| Hill Slope             | -1.471              | -1.32          | -1.502         | -1.697         | -1.36          | -0.5965        | -1.131         | -2.314         | -1.99          |
| ED50                   | 183.7               | 359.3          | 359.6          | 405.9          | 487.5          | 524.9          | 500.8          | 695.6          | 444.2          |
| 95% C.I.               | 79.98 to 421.7      | 288.0 to 448.4 | 238.9 to 541.4 | 308.2 to 534.6 | 374.9 to 633.9 | 214.9 to 1282  | 345.8 to 725.5 | 388.9 to 1244  | 342.9 to 575.4 |
| <b><u>DIBP</u></b>     |                     |                |                |                |                |                |                |                |                |
| Hill Slope             | -9.557              | -1.537         | -1.116         | -1.75          | -1.682         | -1.066         | -1.618         | N/A            | -2.56          |
| ED50                   | 247.9               | 301.7          | 596.6          | 325.3          | 339.1          | 537.6          | 392.6          | N/A            | 304.9          |
| 95% C.I.               | 3.981e-5 to 1.544e9 | 227.6 to 399.8 | 199.3 to 435.5 | 259.5 to 407.9 | 269.2 to 427.3 | 360.9 to 800.8 | 282.2 to 687.8 | N/A            | 223.4 to 416.0 |
| <b><u>DINP</u></b>     |                     |                |                |                |                |                |                |                |                |
| Hill Slope             | -1.526              | -1.152         | -1.116         | -1.397         | -1.435         | -0.9271        | -1.195         | -0.5955        | -1.526         |
| ED50                   | 326.3               | 601.8          | 596.6          | 796.5          | 1148           | 963            | 149.1          | 2239           | 852            |
| 95% C.I.               | 299.6 to 455.7      | 547.4 to 661.7 | 464.5 to 766.2 | 749.9 to 846.0 | 1071 to 1229   | 786.7 to 1179  | 1207 to 1843   | 479.8 to 10449 | 743.8 to 976.1 |
| <b><u>DIDP</u></b>     |                     |                |                |                |                |                |                |                |                |
| Hill Slope             | N/A                 | N/A            | N/A            | N/A            | N/A            | N/A            | N/A            | N/A            | N/A            |
| ED50                   | N/A                 | N/A            | N/A            | N/A            | N/A            | N/A            | N/A            | N/A            | N/A            |
| 95% C.I.               | N/A                 | N/A            | N/A            | N/A            | N/A            | N/A            | N/A            | N/A            | N/A            |
| <b><u>9 PE-mix</u></b> |                     |                |                |                |                |                |                |                |                |
| Hill Slope             | -1.923              | -1.243         | -1.191         | -1.402         | -1.321         | -1.03          | -1.633         | -1.483         | -1.242         |
| ED50                   | 14.21               | 19.96          | 25.64          | 27.22          | 34.61          | 35.7           | 46.23          | 77.32          | 26.05          |
| 95% C.I.               | 12.37 to 16.32      | 17.80 to 22.37 | 20.12 to 32.68 | 23.76 to 31.18 | 30.60 to 39.15 | 25.79 to 49.41 | 41.10 to 52.01 | 51.38 to 116.4 | 21.00 to 32.32 |
